# Supplementary material for: C3 symmetric vanadium(iii) complexes with O,N-chelating hexadentate tripodal ligands of pyrazolone
Source: Royal Society of Chemistry journal article supplement (doi:10.1039/c4ra04021j), 2014-01-01
Supplement: c4ra04021j1.pdf [file c4ra04021j1.pdf]

**Supporting information for**

**$C_3$  Symmetric vanadium(III) complexes with *O,N*-chelating hexadentate tripodal ligands of pyrazolone**

Sanjay Parihar,<sup>a</sup> R. N. Jadeja<sup>a\*</sup> and Vivek K. Gupta<sup>b</sup>

<sup>a</sup> *Department of Chemistry, Faculty of Science, The Maharaja Sayajirao University of Baroda, Vadodara 390 002, India.*

*E-mail: rajendra\_jadeja@yahoo.com*

*Post-Graduate Department of Physics, University of Jammu, Jammu, Jammu 180 006, India.*

---

**Contents:**

Experimental section

Figure S1: <sup>1</sup>H NMR spectra of tripodal ligand L<sup>1</sup>

Figure S2: <sup>13</sup>C NMR spectra of tripodal ligand L<sup>1</sup>

Figure S3: <sup>1</sup>H NMR spectra of tripodal ligand L<sup>2</sup>

Figure S4: <sup>13</sup>C NMR spectra of tripodal ligand L<sup>2</sup>

Figure S5: LC-MS of tripodal ligand L<sup>1</sup>

Figure S6: LC-MS of tripodal ligand L<sup>2</sup>

Figure S7: ORTEP view of tripodal ligands L<sup>1</sup> and L<sup>2</sup>.

Figure S8: LC-MS of [VL<sup>1</sup>]

Figure S9: LC-MS of [VL<sup>2</sup>]

Figure S10: FT-IR spectrum of [VL<sup>1</sup>]

Figure S11: FT-IR spectrum of [VL<sup>2</sup>]

Figure S12: Electronic spectrum of [VL<sup>1</sup>]

## Experimental section

### Materials and characterization

All reagents and solvents were purchased from commercial sources and were further purified by the standard methods, if necessary. Pyrazolone derivatives were obtained from Nutan Dye Chem. Sachin, Surat. Tris(2-aminoethyl)amine was purchased from Sigma-Aldrich. Dry DMF, vanadyl sulfate, benzyl alcohol, POCl<sub>3</sub>, hexane and 30% aqueous H<sub>2</sub>O<sub>2</sub> were purchased from Merck and used as received.

The synthesized tripodal ligands and their vanadium(III) complexes were characterized by <sup>1</sup>H & <sup>13</sup>C NMR, ESI-MS, single crystal XRD, FT-IR, UV-Vis, LC-MS and elemental analyses. <sup>1</sup>H & <sup>13</sup>C NMR spectra were recorded on Avance-III 400 MHz Bruker FT-NMR instrument. Elemental analyses of C, H, and N were determined using a Perkin Elmer series-II 2400 elemental analyzer. Magnetic susceptibilities were measured using a PAR 155 vibrating sample magnetometer fitted with a Walker Scientific L75FBAL magnet at Department of Chemistry, Jadavpur University, Kolkata. Single-crystal structures of L<sup>1</sup> and L<sup>2</sup> were determined using BRUKER SMART APEX (CCD) diffractometer equipped with a graphite-monochromated Mo K $\alpha$  radiation ( $\lambda = 0.71073$ ). Crystallographic data of complex [VL<sup>1</sup>] were recorded on a Xcalibur, Eos, Gemini diffractometer equipped with a graphite-monochromated Cu K $\alpha$  radiation ( $\lambda = 1.54184$ ). FT-IR spectra of ligands and complexes were recorded as the KBr pellet on the Perkin Elmer Fourier transform (FT-IR) spectrum RX 1 spectrometer. Electronic spectra were recorded on a Perkin Elmer Lambda 35 UV-Vis spectrometer. LC-MS spectra were recorded on a Waters Micromass Q-ToF Micro instrument at SAIF, Panjab University, Chandigarh.

### Synthesis of tripodal ligands

#### Synthesis of 3-methyl-5-oxo-1-(p-tolyl)-4,5-dihydro-1H-pyrazole-4-carbaldehyde (1a)

A mixture of 9.4 g. (0.05 mol.) of 3-methyl-1-tolyl-2-pyrazolin-5-one and 10 ml. of dry *N,N'*-dimethylformamide was cooled to 0 °C in a ice bath. Then, 5.5 ml (0.06 mol.) of phosphoryl chloride was added dropwise at such a rate as to maintain the temperature between 5-15 °C. After the addition was complete, the reaction mixture was heated on the steam bath for 1.5 h. The mixture was then poured into 500 ml. of ice-water mixture. The resulting mixture was allowed to stand overnight at room temperature. The yellow solid product was collected by filtration, washed with water and dried to afford 1a. Yield of 8.3 g. (77%) ESI-

MS:  $[M]^+$ : 216.14;  $^1\text{H}$  NMR (400 MHz  $\text{CDCl}_3$ ):  $\delta$  2.39 (*s*, 3H), 2.43 (*s*, 3H), 7.25 (*d*,  $J = 8.4$  Hz, 2H), 7.65 (*d*,  $J = 8.4$  MHz, 2H), 8.49 (*s*, 1H), 9.56 (*s*, 1H).  $^{13}\text{C}$  NMR (400 MHz  $\text{CDCl}_3$ ):  $\delta$  184.77, 158.37, 148.80, 136.93, 134.44, 129.68, 120.94, 105.52, 21.02, 12.32. Elemental analyses (%): found: C 66.68, H 5.64, N 12.96; calcd: C 66.65, H 5.59, N 12.96.

### Synthesis of 3-methyl-5-oxo-1-phenyl-4,5-dihydro-1H-pyrazole-4-carbaldehyde (1b)

Using a similar method to 1a, compound 1b was obtained with a Yield: 8.41 g. (83.3%) ESI-MS:  $[M]^+$ : 202.14;  $^1\text{H}$  NMR(400 MHz  $\text{CDCl}_3$ ):  $\delta$  2.44 (*s*, 3H), 7.28-7.34 (*m*, 1H), 7.45-7.49 (*m*, 2H), 7.79-7.82 (*m*, 2H), 9.07 (*s*, 1H), 9.99 (*s*, 1H).  $^{13}\text{C}$  NMR (400 MHz  $\text{CDCl}_3$ ):  $\delta$  12.38, 105.66, 120.89, 126.97, 129.17, 136.90, 148.99, 158.76, 184.57. Elemental analyses (%): found: C 65.41, H 5.13, N 13.86; calcd: C 65.34, H 4.98, N 13.85.

### Synthesis of tripodal ligand L<sup>1</sup>

Aldehyde 1a (0.648 g, 3 mmol) and 40 ml methanol were added to a 3-neck 100 mL round-bottom flask equipped with a magnetic stirrer. The aldehyde was dissolved by heating the solution. A dropping funnel containing diluted Tris(2-aminoethyl)amine (0.142 mL, 1 mmol) with 10 mL of dry MeOH was fitted in to the 3-neck round-bottom flask. Tris(2-aminoethyl)amine solution was added dropwise allowing for complete dispersion of each drop between the additions with constant stirring under  $\text{N}_2$  atmosphere. After all tris(2-aminoethyl)amine solution was added, the yellow solution was allowed to stir at reflux temperature for another 6 h. The light yellow compound precipitated was filtered, washed with methanol and dried under vacuum. The product was recrystallized in warm MeCN at RT. Yield 84%.  $^1\text{H}$  NMR (400 MHz,  $\text{CDCl}_3$ ):  $\delta$  1.96 (*s*, 3H), 2.33 (*s*, 3H), 2.2.92-2.89 (*t*,  $J = 5.2, 4.8$  MHz, 2H), 3.56 (*s*, 2H), 7.15-7.17 (*d*,  $J = 8.4$  MHz, 2H), 7.63-7.66 (*d*,  $J = 12$  MHz, 1H), 7.83-7.85 (*d*,  $J = 8.4$  MHz, 2H), 9.90 (*s*, 1H).  $^{13}\text{C}$  NMR (400 MHz,  $\text{CDCl}_3$ ):  $\delta$  12.28, 20.96, 48.72, 56.57, 100.44, 118.98, 129.22, 133.76, 136.62, 148.05, 152.28, 165.46. Elem. anal. Calcd. for  $\text{C}_{42}\text{H}_{48}\text{N}_{10}\text{O}_3$ : C 68.09, H 6.53, N 18.91; found C 68.12, H 6.56, N 18.92. ESI-MS:  $m/z$   $[M]^+$  740.39; found 741.41  $[M+H]^+$ .

### Synthesis of tripodal ligand L<sup>2</sup>

Tripodal ligand L<sup>2</sup> was synthesized by the procedure similar to L<sup>1</sup>. Yield 81%.  $^1\text{H}$  NMR (400 MHz,  $\text{CDCl}_3$ ):  $\delta$  1.97 (*s*, 1H), 2.85-2.88 (*t*,  $J = 5$  MHz, 2H), 3.52 (*s*, 2H), 7.09-7.13 (*m*, 1H), 7.33-7.37 (*m*, 2H), 7.65-7.67 (*d*,  $J = 10.4$  MHz, 1H), 7.96-7.98 (*d*,  $J = 8$  MHz, 2H), 9.88 (*s*, 1H).  $^{13}\text{C}$  NMR (400 MHz,  $\text{CDCl}_3$ ):  $\delta$  12.80, 47.99, 54.72, 99.20, 117.66, 123.57,

129.01, 140.02, 153.91, 165.43. Elem. Anal. Calcd. for  $C_{39}H_{42}N_{10}O_3$ : C 67.03, H 6.06, N 20.04; found C 67.08, H 6.09, N 67.08. ESI-MS:  $m/z$   $[M]^+$  698.34; found 699.31  $[M+H]^+$ .

### Synthesis of complex $[V(L^1)]$

To a well stirred hot ethanolic solution of tripodal ligand  $L^1$  (0.740 g, 1 mmol), an ethanolic solution of  $VOSO_4 \cdot 5H_2O$  (0.253 g, 1 mmol) was added drop wise. An ethanolic solution of NaOH (0.20 g in 10 mL) was added drop wise to the reaction mixture till green precipitates of complex were observed (pH = 8-9). The reaction was further stirred on reflux temperature for 1 h. The precipitates were filtered, washed with hot distilled water and then ethanol, and dried under a vacuum. The obtained complex was designated as  $VL^1$ . Yield 421.7 g (53.5%). Elem anal. Calcd for  $C_{42}H_{45}N_{10}O_3V$ : C 63.95, 5.75, 17.76; found C 64.26, H 5.72, N 17.46. LC-MS:  $m/z$  788.41  $[M]^+$ , 789.41  $[M+H]^+$ , 811.44  $[M+Na]^+$ .

### Synthesis of complex $[V(L^2)]$

To a well stirred hot ethanolic solution of tripodal ligand  $L^2$  (0.698 g, 1 mmol), an ethanolic solution of vanadyl acetylacetonate (0.256 g, 1 mmol) was added drop wise. An ethanolic solution of NaOH (0.20 g in 10 mL) was added drop wise to the reaction mixture till green precipitates of complex observed (pH = 8-9). The reaction was further stirred on reflux temperature for 1 h. The precipitates were filtered, washed with hot distilled water and then ethanol, and dried under a vacuum. The obtained complex was designated as  $VL^2$ . Yield 0.343 g (46%). Elem anal. Calcd for  $C_{39}H_{39}N_{10}O_3V$ : C 62.73, 5.26, 18.76; found C 62.53, H 5.58, N 18.18. LC-MS:  $m/z$  746.45  $[M]^+$ , 747.42  $[M+H]^+$ , 769.48  $[M+Na]^+$ .

SJY-143 1H Sanjay parihar  
 PROTON CDCL3 {D:\AB} MSU-Chem 1

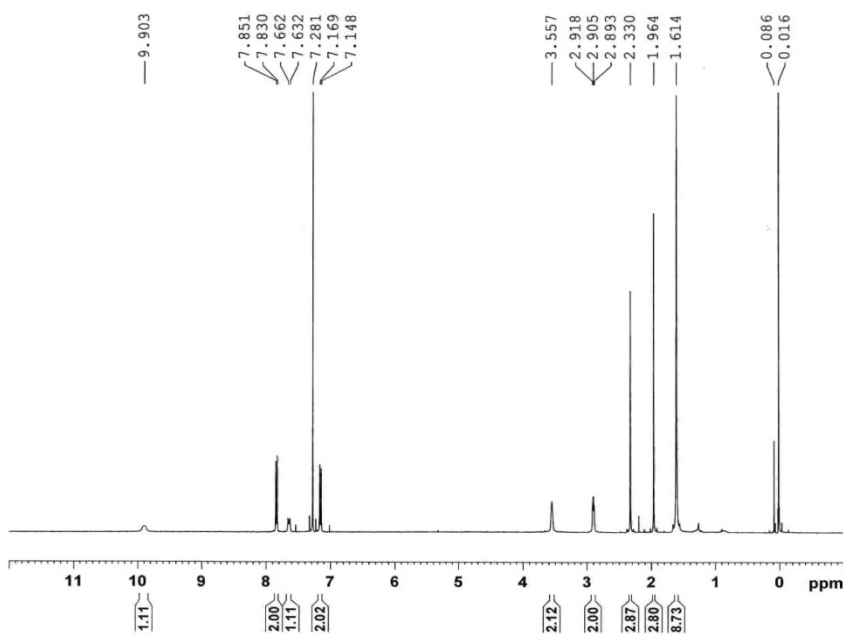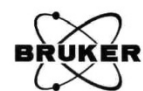

```

NAME          SJY-143
EXPNO         1
PROCNO        1
Date_         20110310
Time          16.11
INSTRUM       spect
PROBHD        5 mm PABBO BB-
PULPROG       zgpg30
TD            65536
SOLVENT       CDCL3
NS            16
DS            4
SWH           8223.685 Hz
F2RES         0.111845 Hz
AQ            3.9844387 sec
RG            362
DW            65.800 usec
DE            6.50 usec
TE            299.2 K
D1            1.00000000 sec
TD0           1
----- CHANNEL f1 -----
NUC1          1H
P1            14.00 usec
PL1           -2.00 dB
PL12          10.8011122 W
SFO1          400.1524711 MHz
SF           400.1500000 MHz
WDW           EM
SSB           0
LB            0.30 Hz
GB            0
PC            1.00
  
```

Figure S1: <sup>1</sup>H NMR spectra of tripodal ligand L<sup>1</sup>

SJ-143  
 C13CPD CDCL3 {D:\RT} MSU-Chem 1

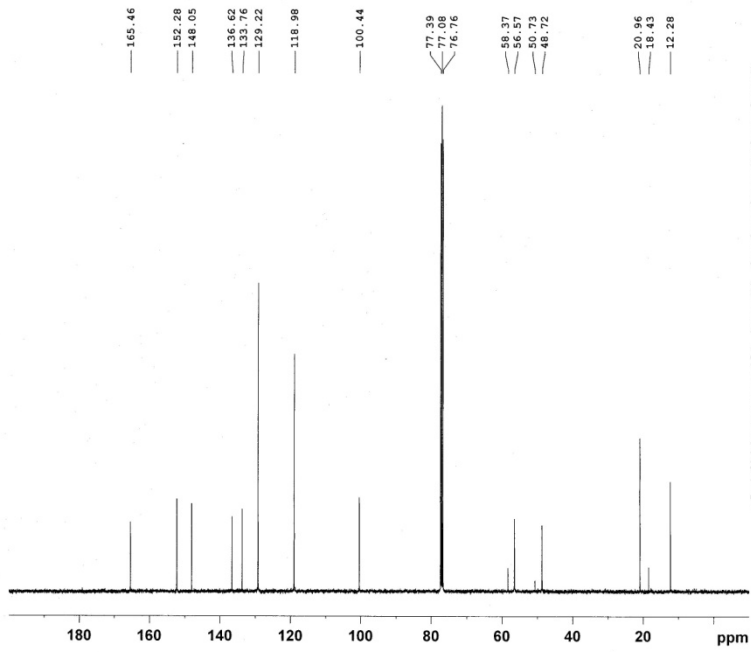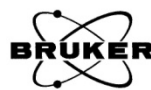

```

NAME          RT 12-09-2011
EXPNO         14
PROCNO        1
Date_         20110912
Time          12.17
INSTRUM       spect
PROBHD        5 mm PABBO BB-
PULPROG       zgpg30
TD            65536
SOLVENT       CDCL3
NS            1024
DS            4
SWH           24038.461 Hz
F2RES         0.366798 Hz
AQ            1.3631988 sec
RG            362
DW            20.800 usec
DE            6.50 usec
TE            291.2 K
D1            2.00000000 sec
D11           0.03000000 sec
TD0           1
----- CHANNEL f1 -----
NUC1          13C
P1            12.00 usec
PL1           -2.00 dB
PL12          56.9293210 W
SFO1          100.6278593 MHz
----- CHANNEL f2 -----
CPCPRG2      wait216
NUC2          1H
PCTF02       80.00 usec
PL2           0.00 dB
PL12         15.14 dB
PL13         15.14 dB
PL14         10.8011122 W
PL15W        0.33072606 W
PL16W        0.33072606 W
SFO2         400.1516006 MHz
SI            32768
SF           100.6177980 MHz
WDW           EM
SSB           0
LB            1.00 Hz
GB            0
PC            1.40
  
```

Figure S2: <sup>13</sup>C NMR spectra of tripodal ligand L<sup>1</sup>

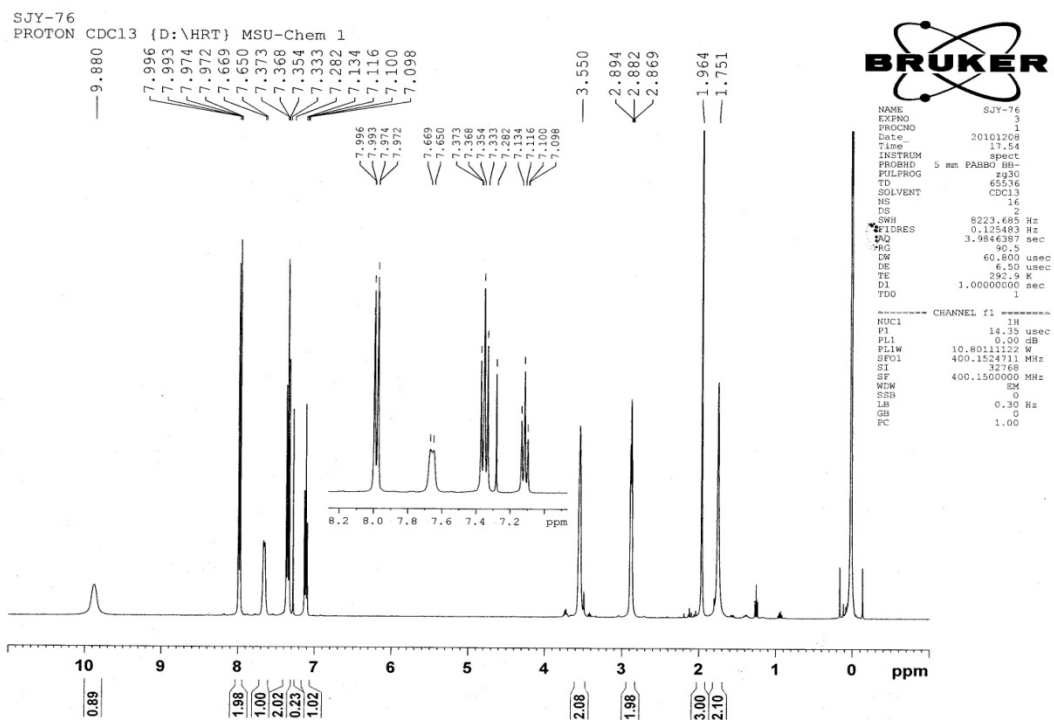

Figure S3:  $^1\text{H}$  NMR spectra of tripodal ligand  $\text{L}^2$

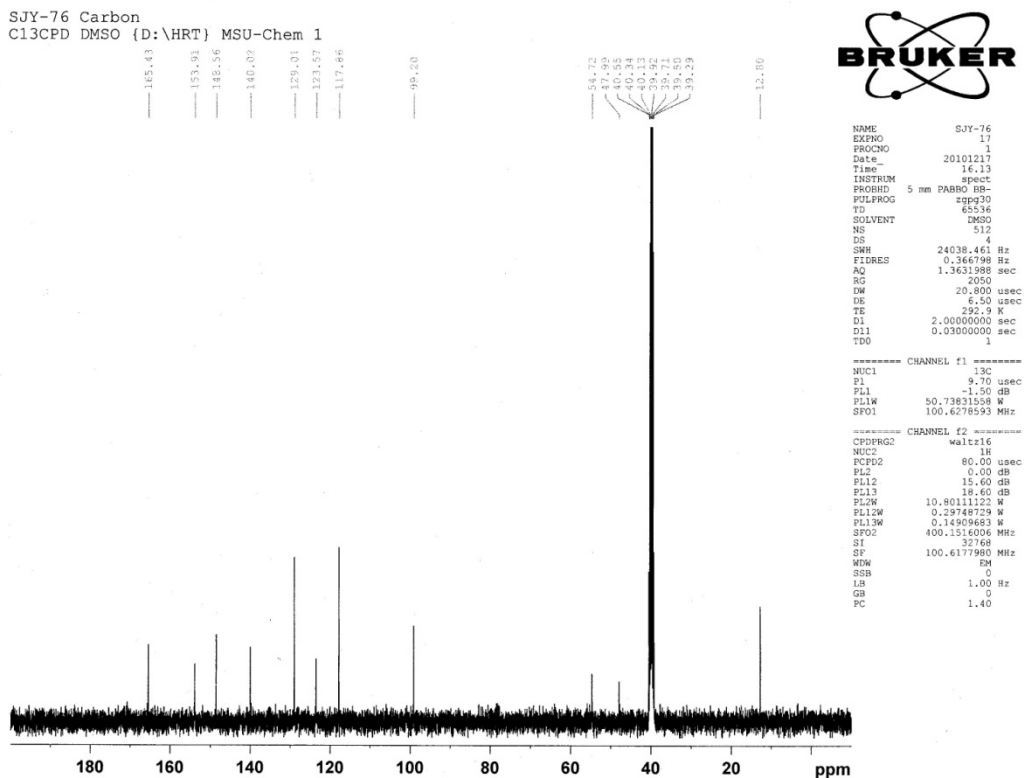

Figure S4:  $^{13}\text{C}$  NMR spectra of tripodal ligand  $\text{L}^2$

WATERS, Q-TOF MICROMASS (LC-MS)

SANJAY SJY-143 7 (0.102) Cm (4:40)

SAIF/CIL,PANJAB UNIVERSITY,CHANDIGARH

TOF MS ES+

4.37e3

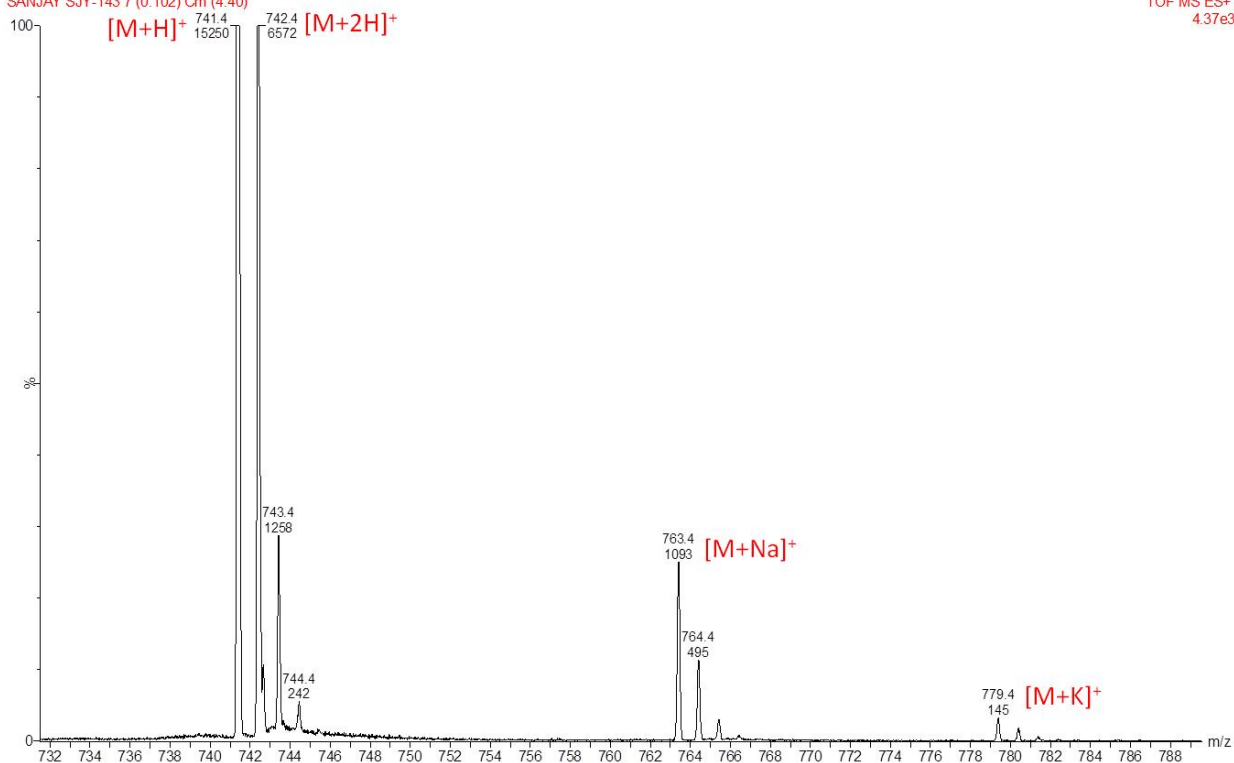

Figure S5: LC-MS of tripodal ligand L<sup>1</sup>

WATERS, Q-TOF MICROMASS (LC-MS)

SANJAY SJY-192 6 (0.087) Cm (5:37)

SAIF/CIL,PANJAB UNIVERSITY,CHANDIGARH

TOF MS ES+

4.51e3

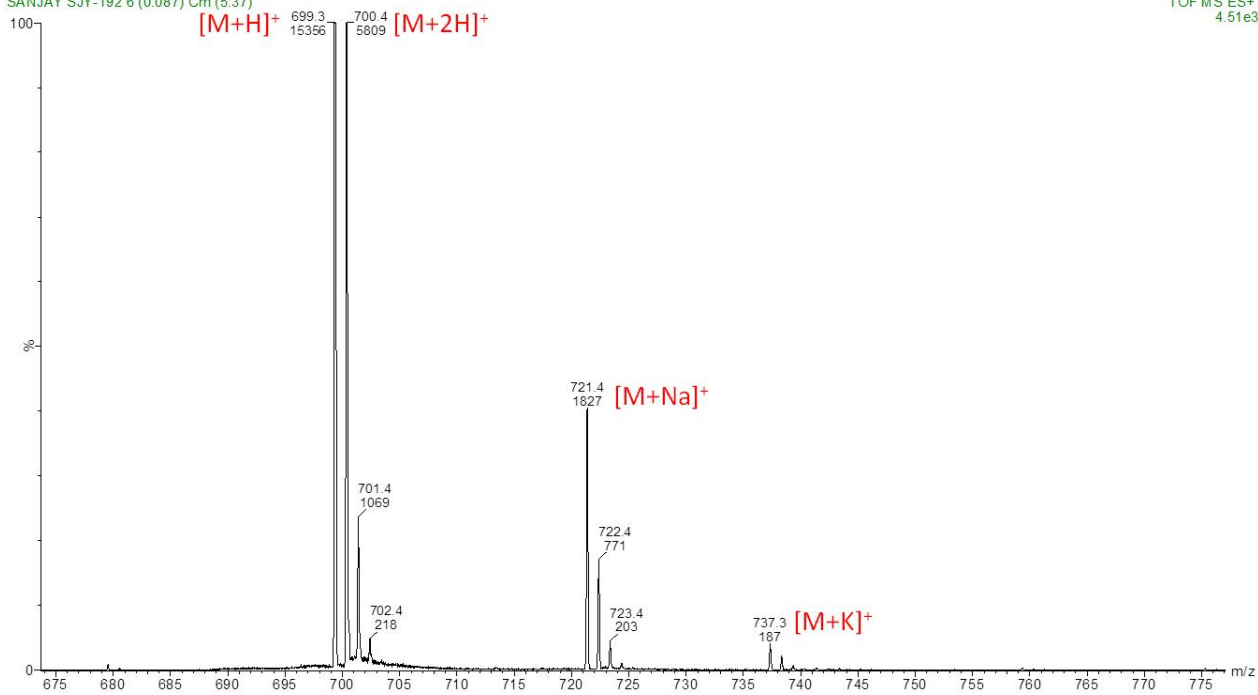

Figure S6: LC-MS of tripodal ligand L<sup>2</sup>

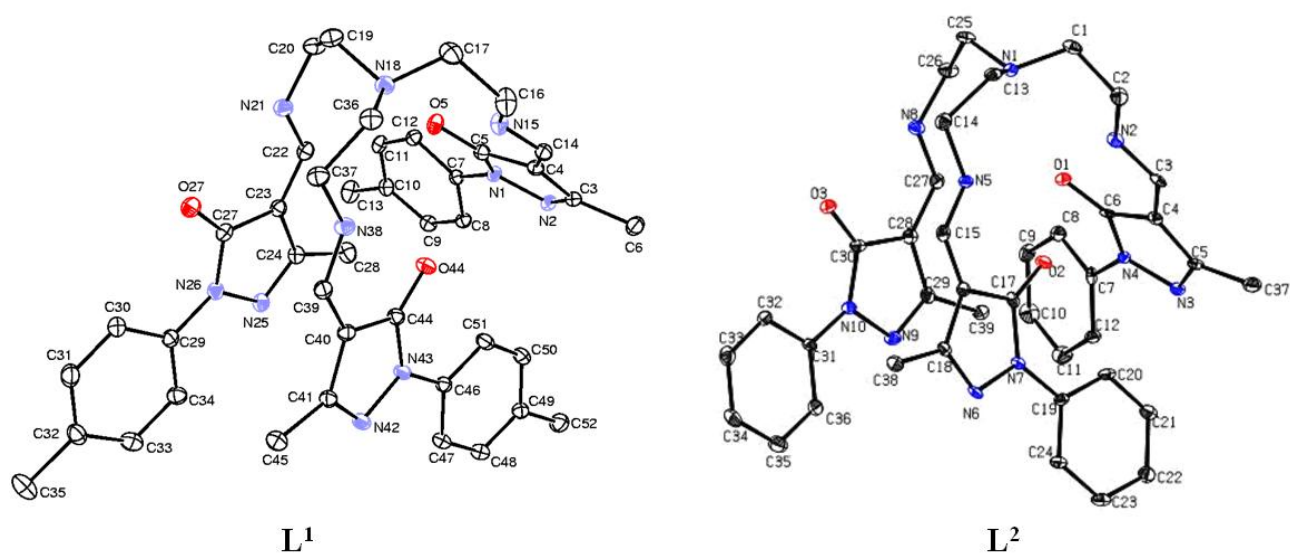

**Figure S7:** ORTEP view of tripodal ligands L<sup>1</sup> and L<sup>2</sup>.

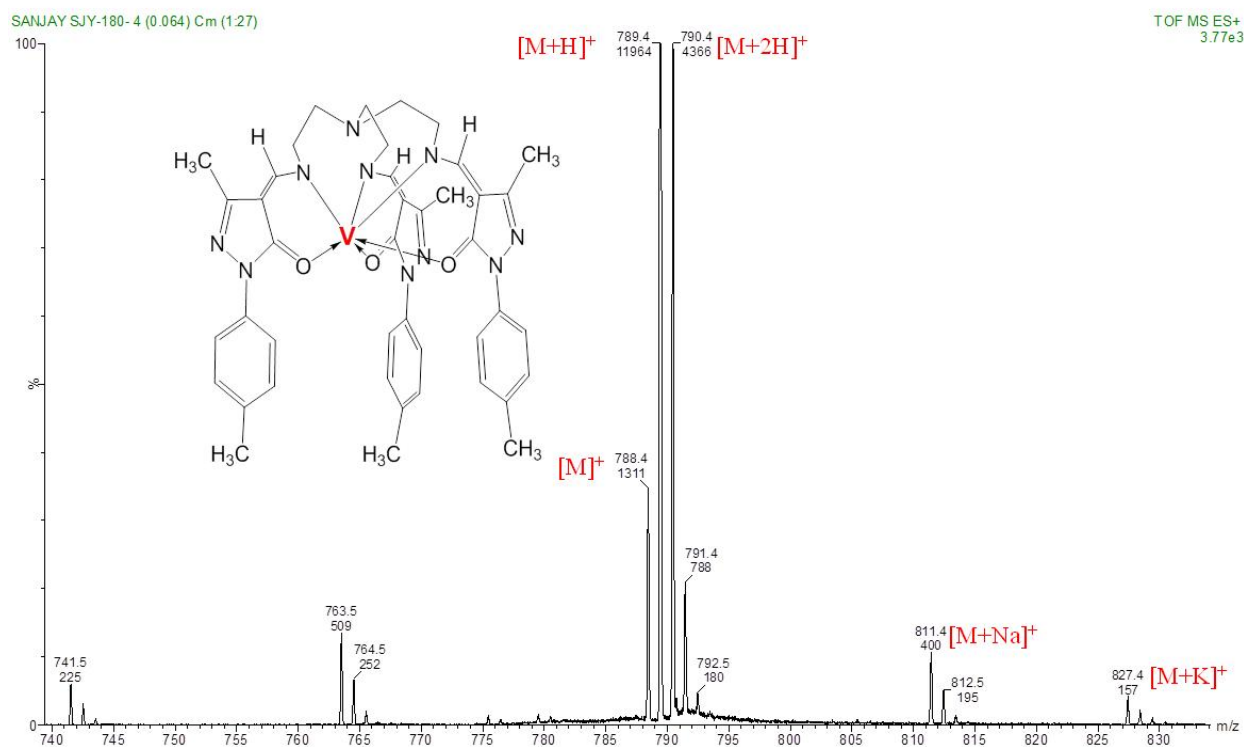

**Figure S8:** LC-MS of [VL<sup>1</sup>]



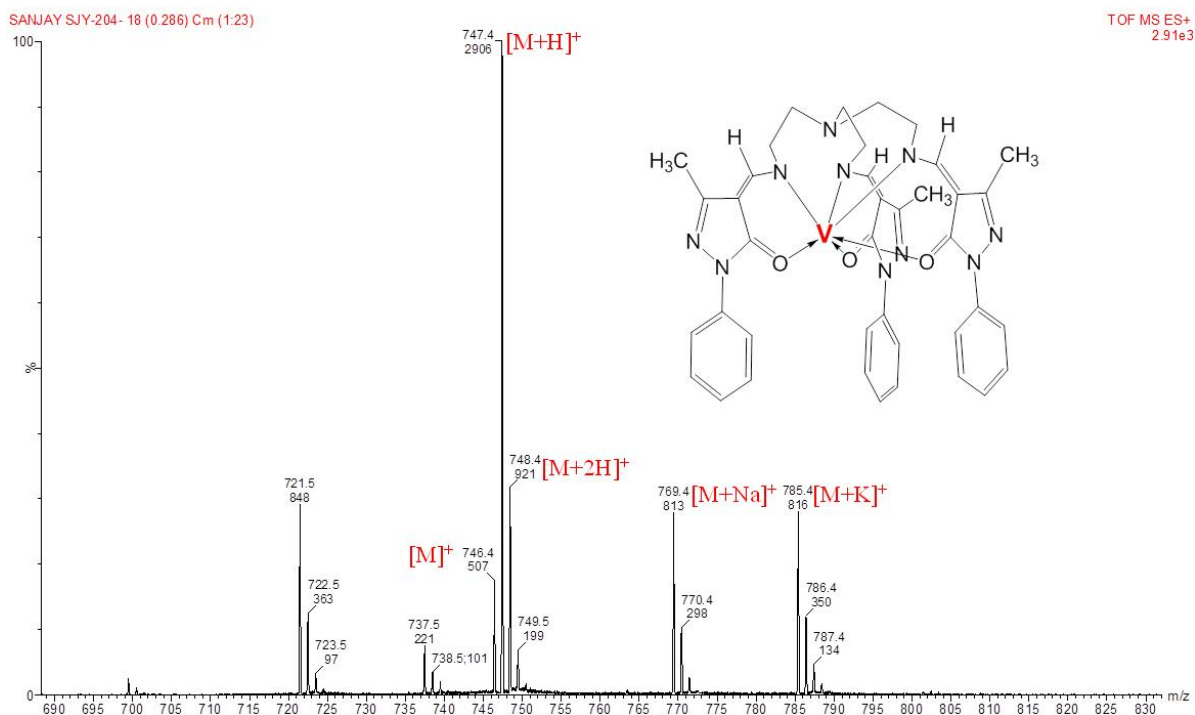

**Figure S9: LC-MS of [VL<sup>2</sup>]**

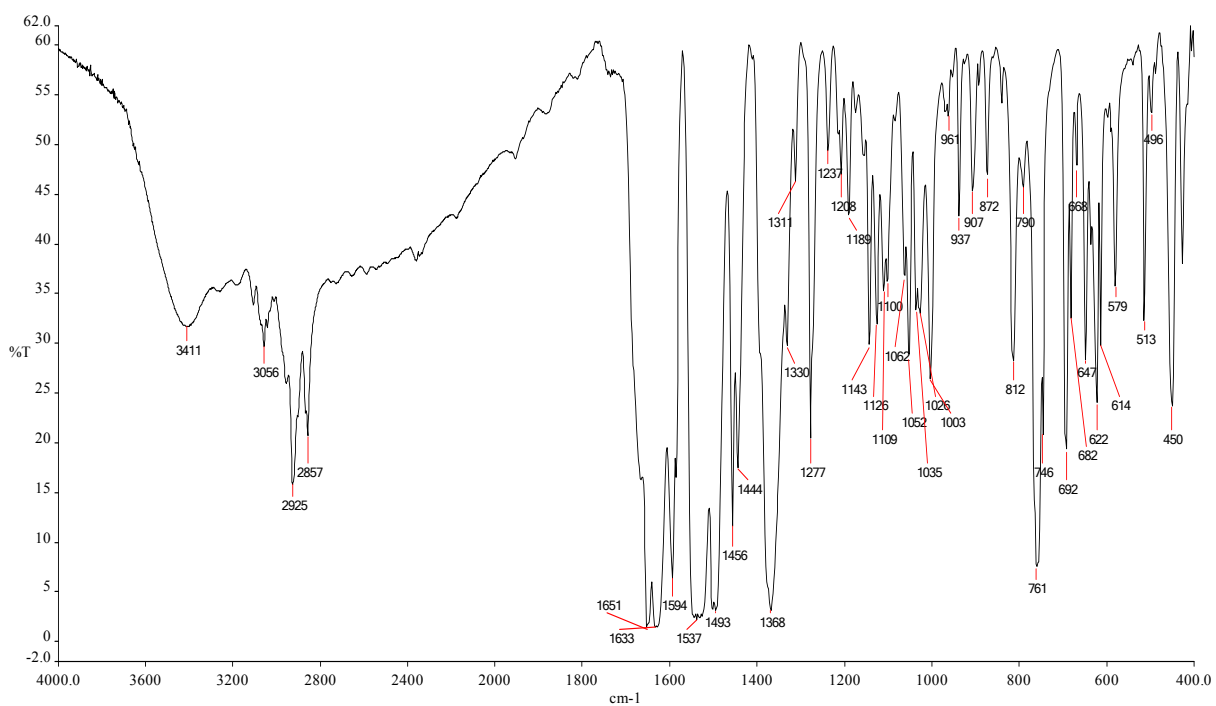

**Figure S10: FT-IR spectrum of [VL<sup>1</sup>].**

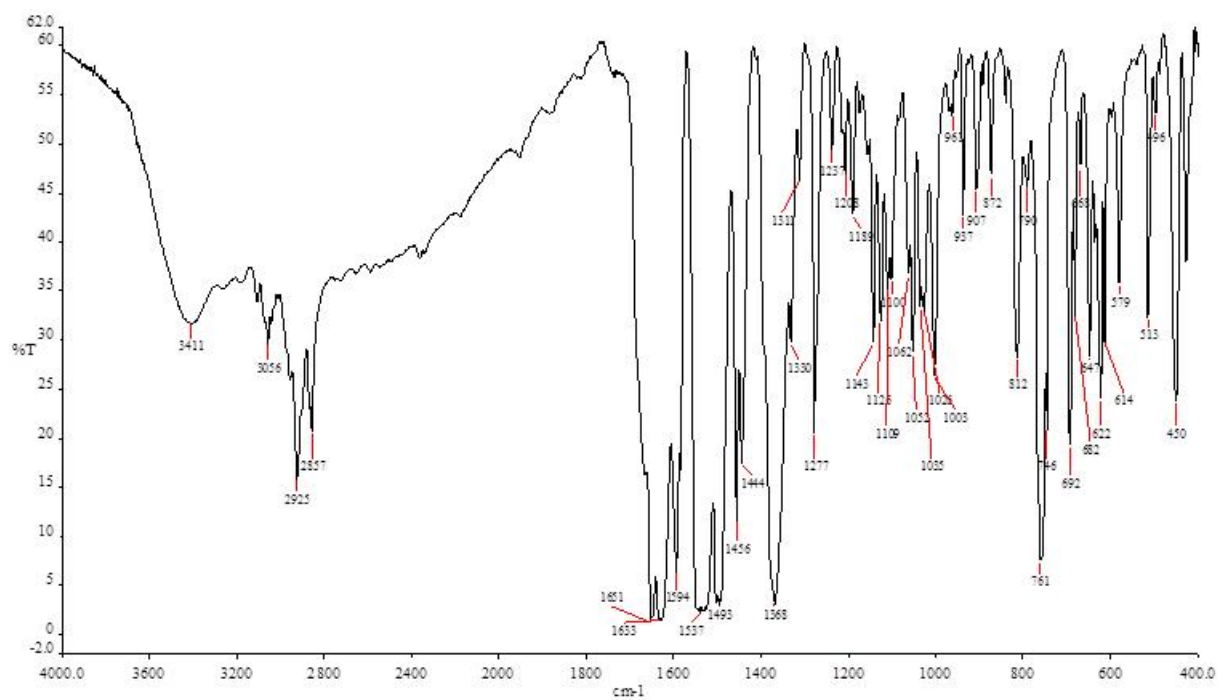

**Figure S11:** FT-IR spectrum of [VL<sup>2</sup>].

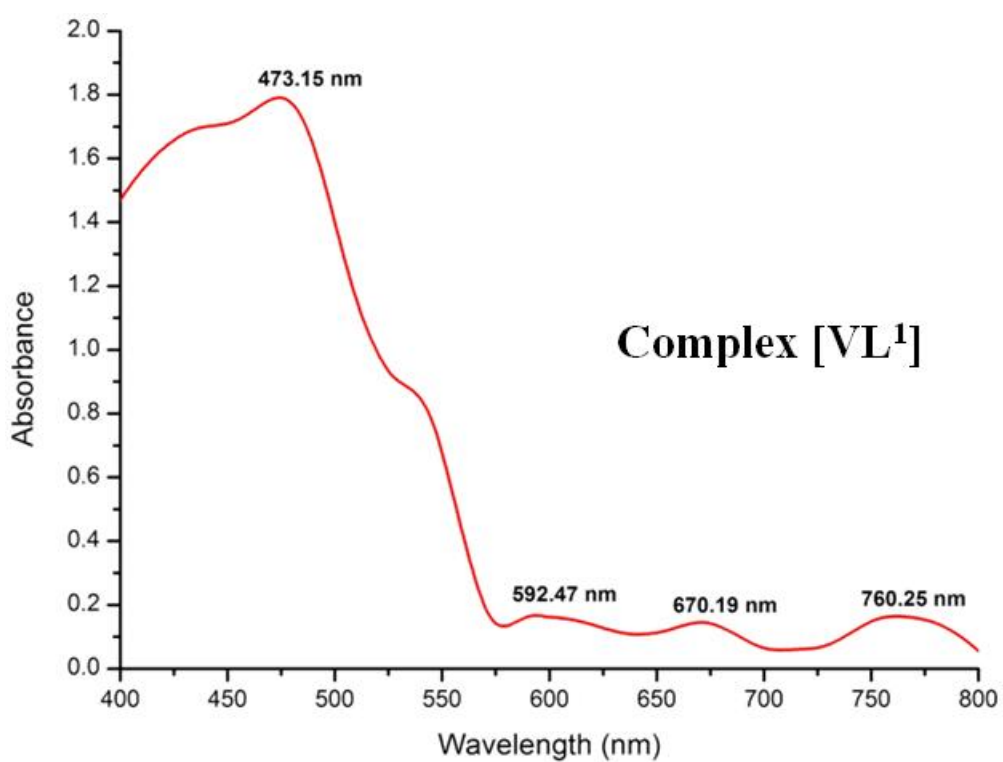

**Figure S12:** Electronic spectrum of [VL<sup>1</sup>].
